# Supplementary material for: Preparation, Physicochemical Properties, and Hemocompatibility of the Composites Based on Biodegradable Poly(Ether-Ester-Urethane) and Phosphorylcholine-Containing Copolymer
Source: MDPI journal article supplement (doi:10.3390/polym11050860), 2019-05-11
Supplement: s1 [file s1]

## Supporting Information

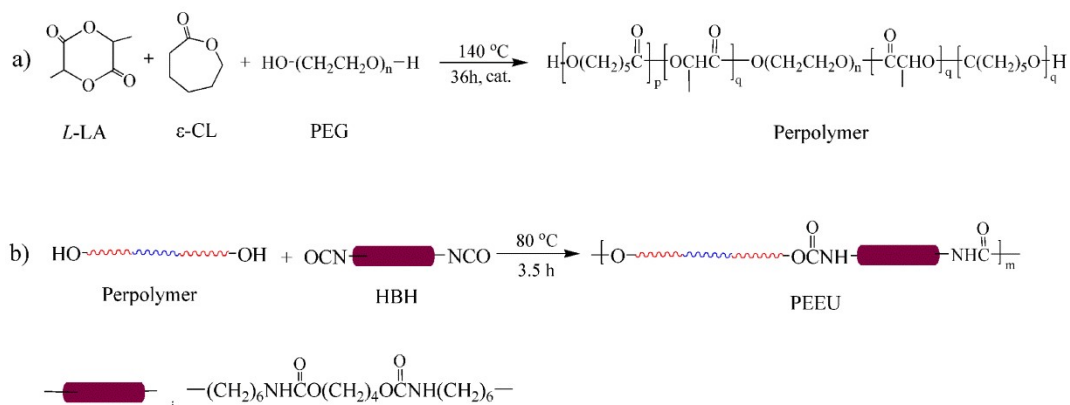

**Figure S1.** The reaction scheme of PEEU

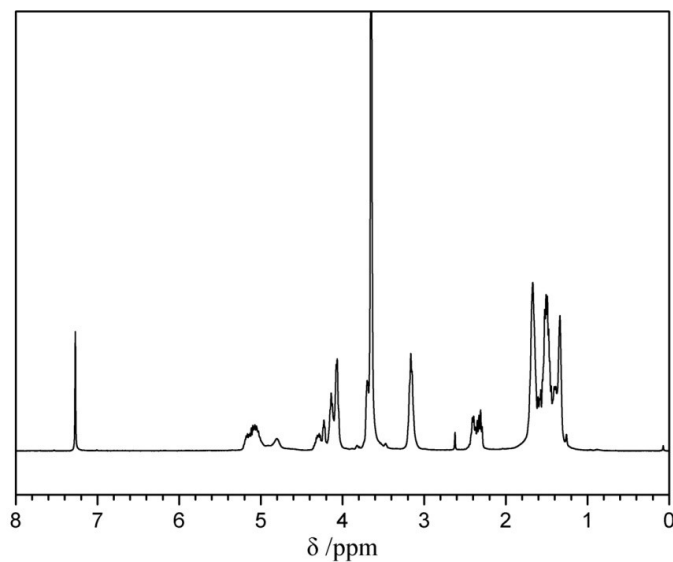

**Figure S2.** <sup>1</sup>H NMR spectrum of PEEU

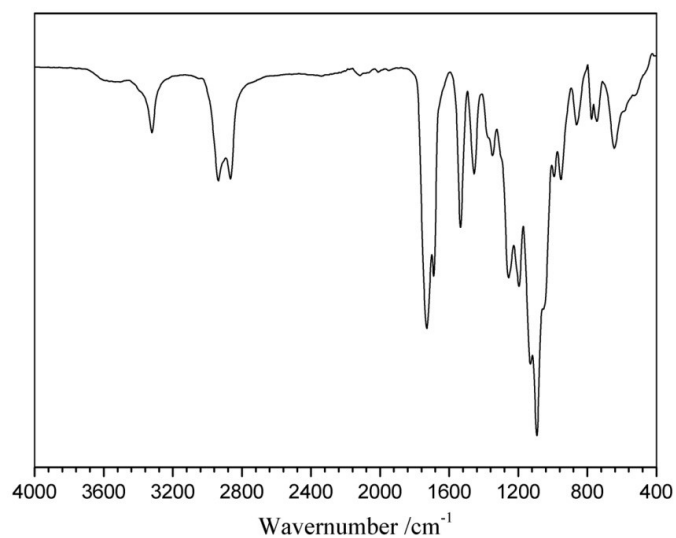

**Figure S3.** FT-IR spectrum of PEEU

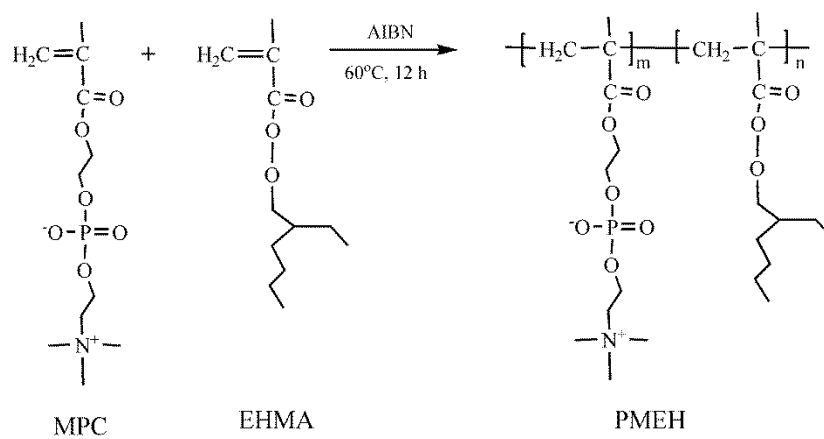

**Figure S4.** The reaction scheme of PME H

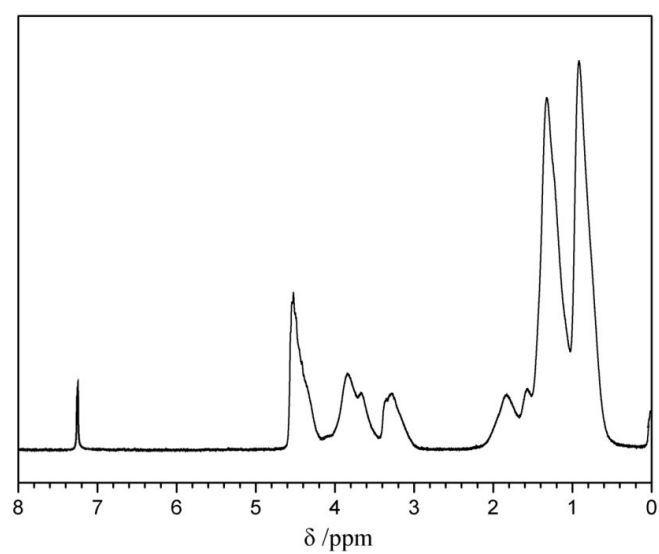

**Figure S5.**  $^1\text{H}$  NMR spectrum of PME H

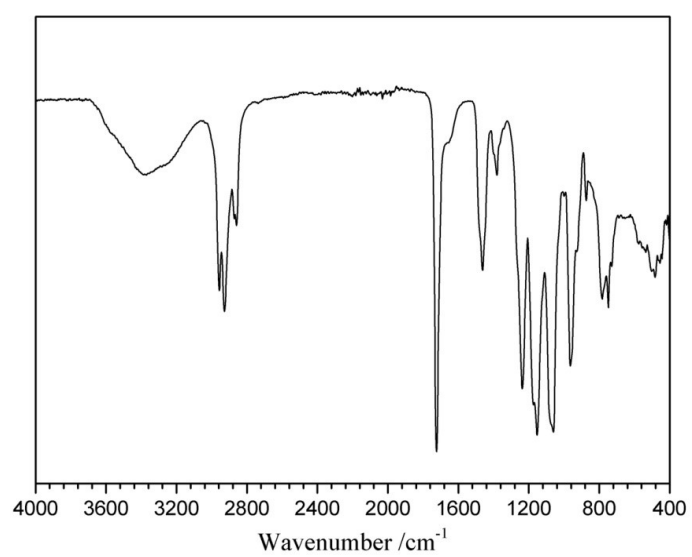

**Figure S6.** FT-IR spectrum of PME H

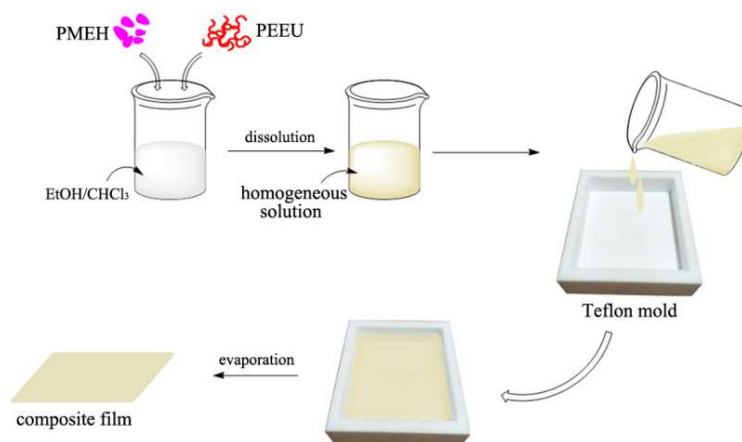

**Figure S7.** Preparation of composite film

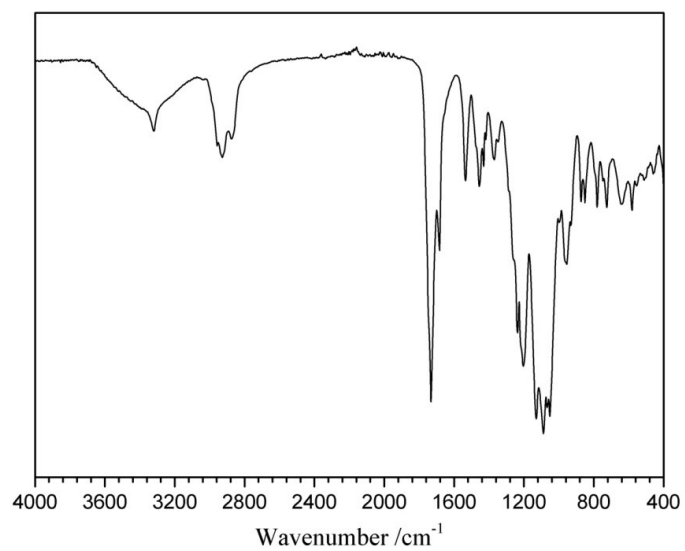

**Figure S8.** FT-IR spectrum of PMPU-10
